# Supplementary figures and images for: Effect ofGinkgo bilobaextract on pharmacology and pharmacokinetics of atorvastatin in rats with hyperlipidaemia
Source: Royal Society of Chemistry journal article supplement (doi:10.1039/d2fo03238d), 2023-01-01

Supplementary Figure 1

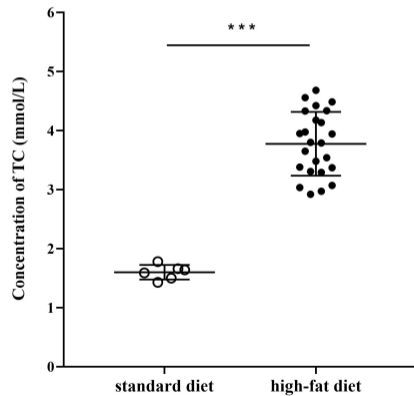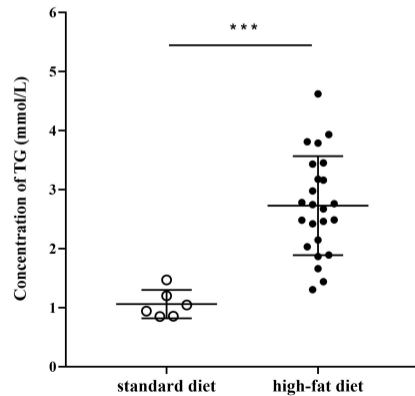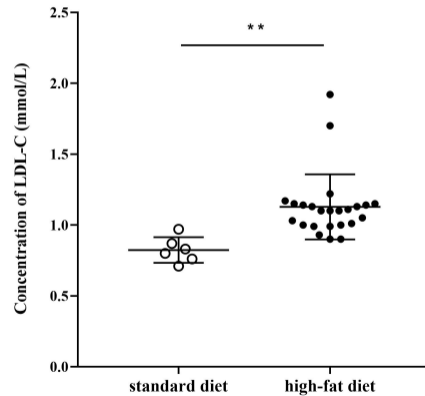

Supplement: d2fo03238d2.pdf [file d2fo03238d2.pdf]

### Supplementary Figure 3

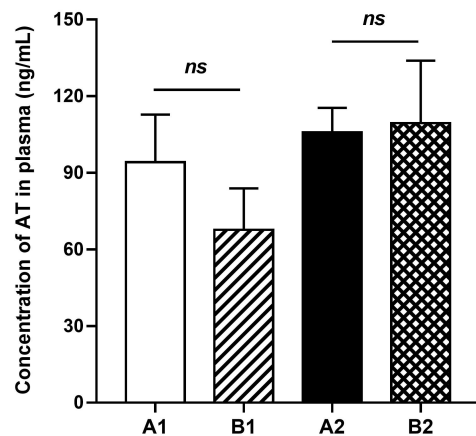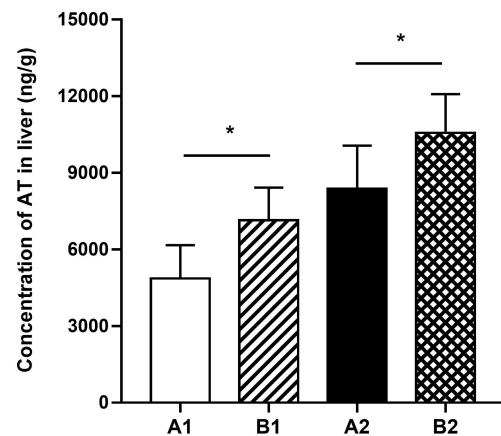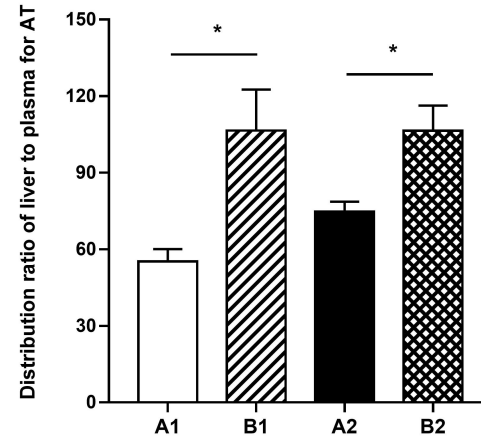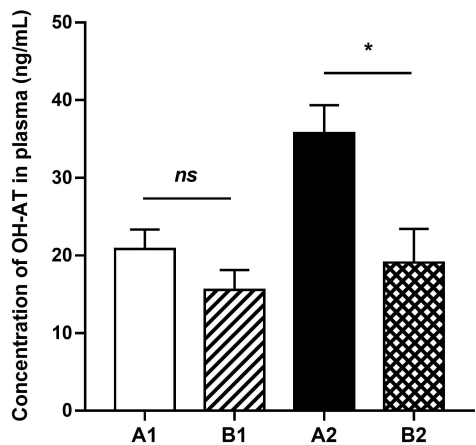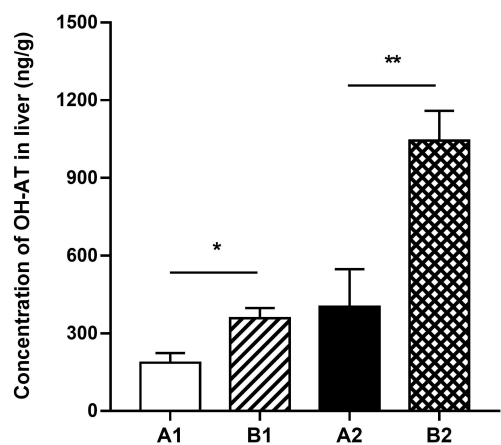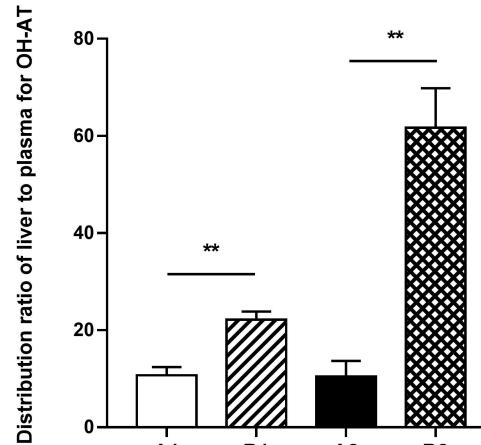

Supplement: d2fo03238d4.pdf [file d2fo03238d4.pdf]

Supplementary Figure 4

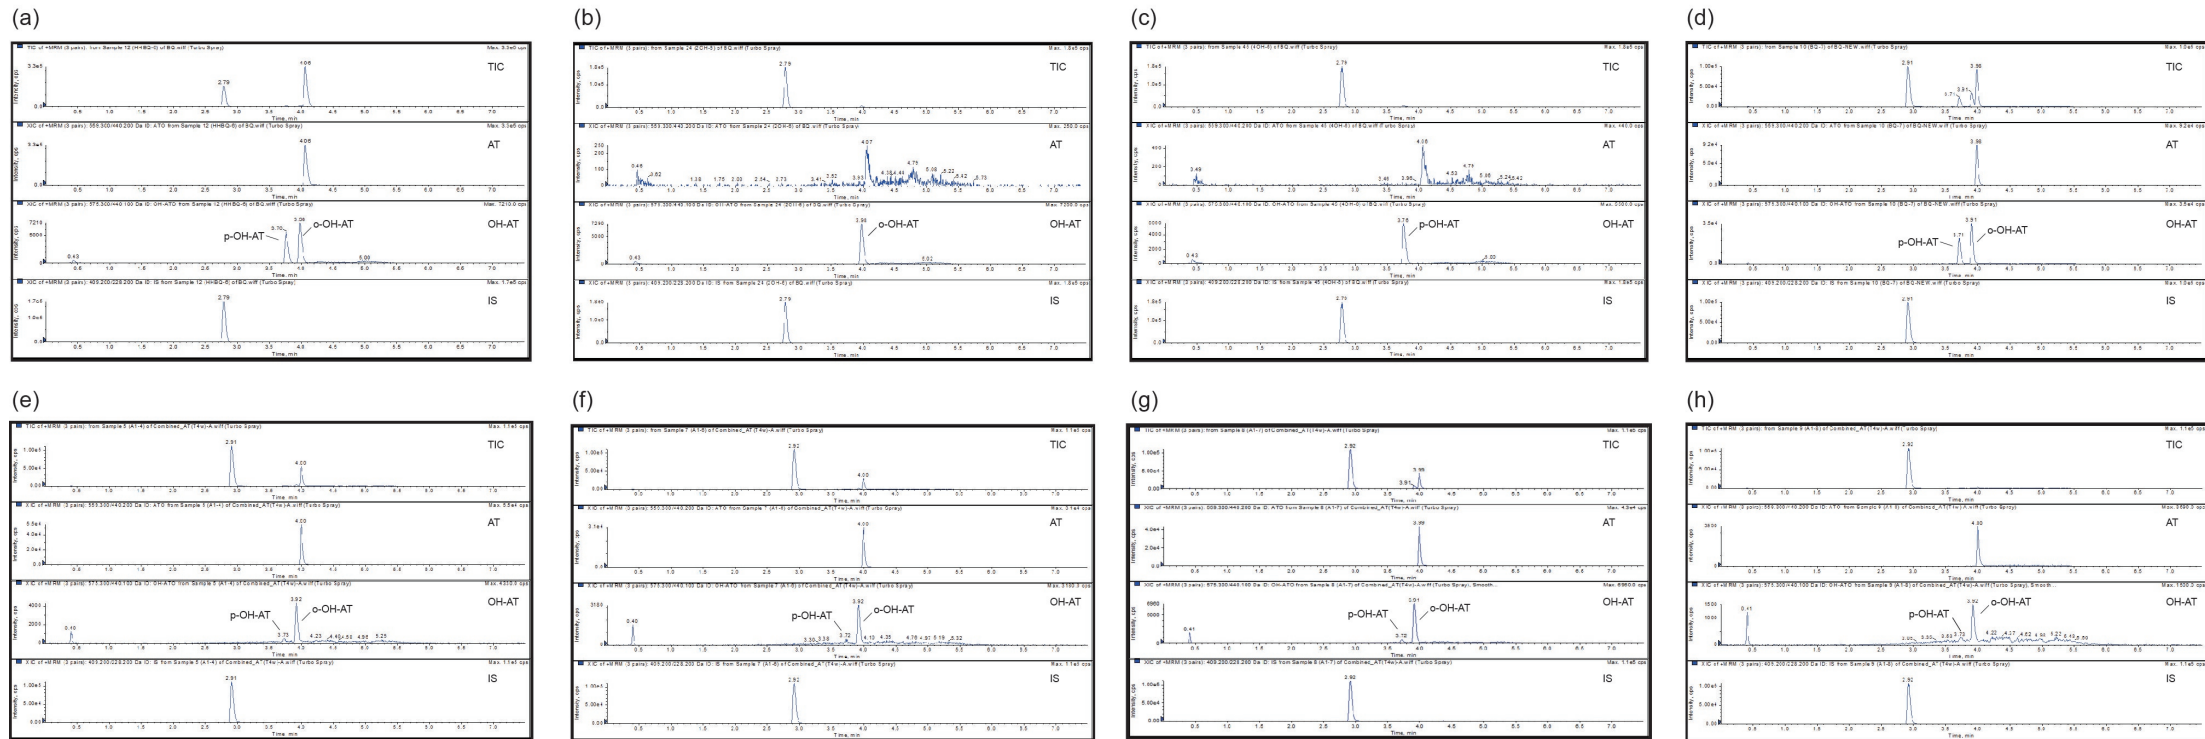

Supplement: d2fo03238d5.pdf [file d2fo03238d5.pdf]

## Supplementary Figure 5

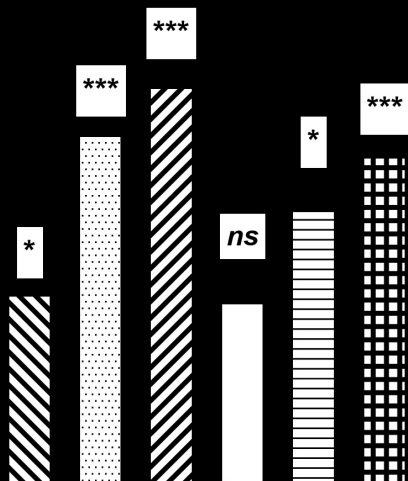

Supplement: d2fo03238d6.pdf [file d2fo03238d6.pdf]

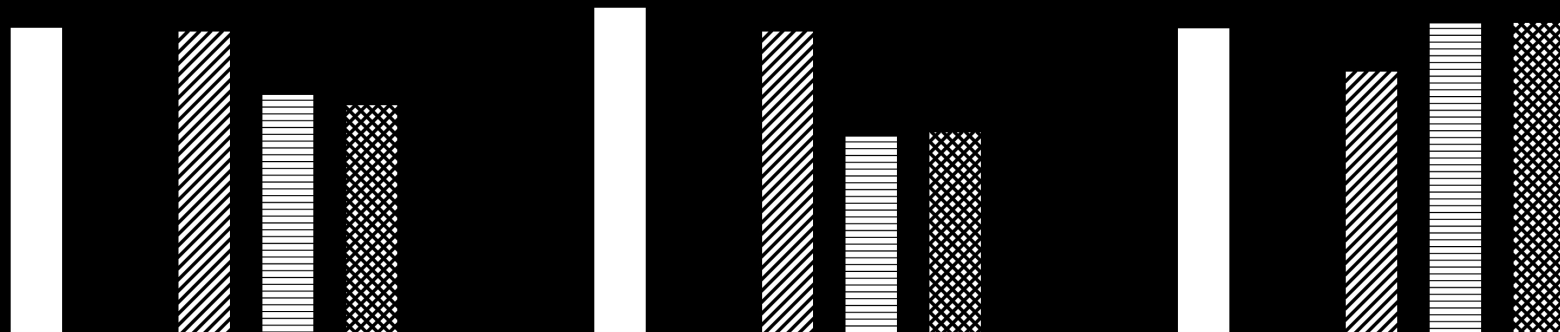

Supplement: d2fo03238d7.pdf [file d2fo03238d7.pdf]
